# Supplementary material for: Gas chromatography-tandem mass spectrometry-based detection of half nitrogen mustards in plasma as a new biomarker of nitrogen mustard exposure
Source: Royal Society of Chemistry journal article supplement (doi:10.1039/d0ay00916d), 2020-01-01
Supplement: d0ay00916d1.pdf [file d0ay00916d1.pdf]

## Supplementary Information

### **Gas Chromatography-Tandem Mass Spectrometry based Detection of Half Nitrogen Mustards in Plasma as a New Biomarker of Nitrogen Mustards exposure**

Buddhadeb Chandra<sup>a</sup>, Kanchan Sinha Roy<sup>ab</sup>, MahabulShaik<sup>a</sup>, Chandrakant Waghmare<sup>a</sup>, Ramarao Golime<sup>a</sup>, and Meehir Palit<sup>a\*</sup>

<sup>a</sup>*VERTOX Laboratory, Defence Research and Development Establishment,  
Jhansi Road, Gwalior-474002, Madhya Pradesh, India.*

<sup>b</sup>*Present Address: Department of Chemistry, University of Waterloo, Waterloo, ON, Canada,*

*N2L 3G1*

\*Corresponding Author:

Fax: (+) 0751-2341148

E-mail: [meehirpalit@rediffmail.com](mailto:meehirpalit@rediffmail.com)

## Contents

| Sl. No. | Caption                                                                                                                                        | Figure/table no. |
|---------|------------------------------------------------------------------------------------------------------------------------------------------------|------------------|
| 1.      | Different approaches for the synthesis of halfNMs                                                                                              | Scheme S1        |
| 2.      | Hydrolysis kinetics of NM salts: Log (C <sub>0</sub> /C) vs time (min) coordinates for the hydrolysis of NMs salts in 2:1 (v/v), acetone-water | Figure S1        |
| 3.      | Observed half-life time of salts of NM in 2:1 (v/v), acetone-water solution.                                                                   | Table S1         |
| 4.      | Screening of the temperature for the heptafluorobutyrylation of half NMs.                                                                      | Figure S2        |
| 5.      | Fine optimization of the temperature for the heptafluorobutyrylation of halfNMs.                                                               | Figure S3        |
| 6.      | Study of the effect of time on the heptafluorobutyrylation of halfNMs.                                                                         | Figure S4        |

|     |                                                                                                                                                                                                                                                |                              |
|-----|------------------------------------------------------------------------------------------------------------------------------------------------------------------------------------------------------------------------------------------------|------------------------------|
| 7.  | PCI-MS spectra of a) halfHN2HFB, b) halfHN1HFB, c) 1halfHN3HFB and d) 2halfHN3HFB respectively.                                                                                                                                                | Figure S5                    |
| 8.  | Collision energy optimization during SRM based method development for half NMs.                                                                                                                                                                | Figure S6a, S6b, S6c and S6d |
| 9.  | Parameters for Multiple Reaction Monitoring (MRM)                                                                                                                                                                                              | Table S2                     |
| 10. | Calibration curve for half NMs taking plasma as a matrix.                                                                                                                                                                                      | Figure S7                    |
| 11. | SRM chromatograms, with transition 348 → 241 (quantifier ion) and 312 → 241 (qualifier ion), obtained during <i>in-vitro</i> analysis of halfHN1 in human plasma; (a) blank sample, (b) HN1 spiked sample, and (c) Standard reference sample.  | Figure S8                    |
| 12. | SRM chromatograms, with transition 382 → 241 (quantifier ion) and 346 → 241 (qualifier ion), obtained during <i>in-vitro</i> analysis of 1halfHN3 in human plasma; (a) blank sample, (b) HN1 spiked sample, and (c) Standard reference sample. | Figure S9                    |
| 13. | SRM chromatograms, with transition 560 → 241 (quantifier ion) and 346 → 241 (qualifier ion), obtained during <i>in-vitro</i> analysis of 2halfHN3 in human plasma; (a) blank sample, (b) HN1 spiked sample, and (c) Standard reference sample. | Figure S10                   |
| 14. | Response of halfHN2 with respect to time after exposure of Wister rat with 1X LD <sub>50</sub> of HN2 ( <i>in vivo</i> analysis).                                                                                                              | Figure S11                   |

### 1st approach:

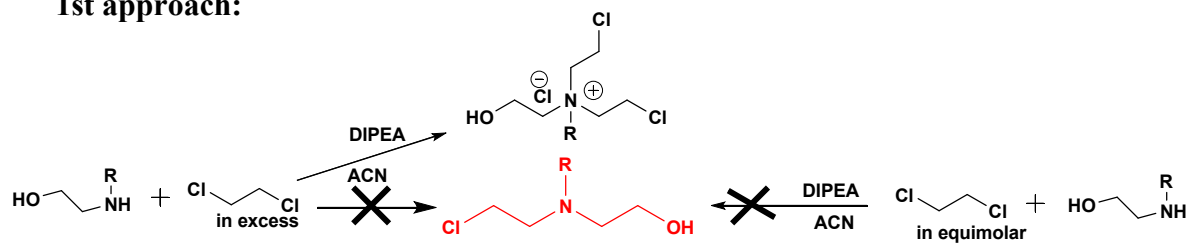

### 2nd approach:

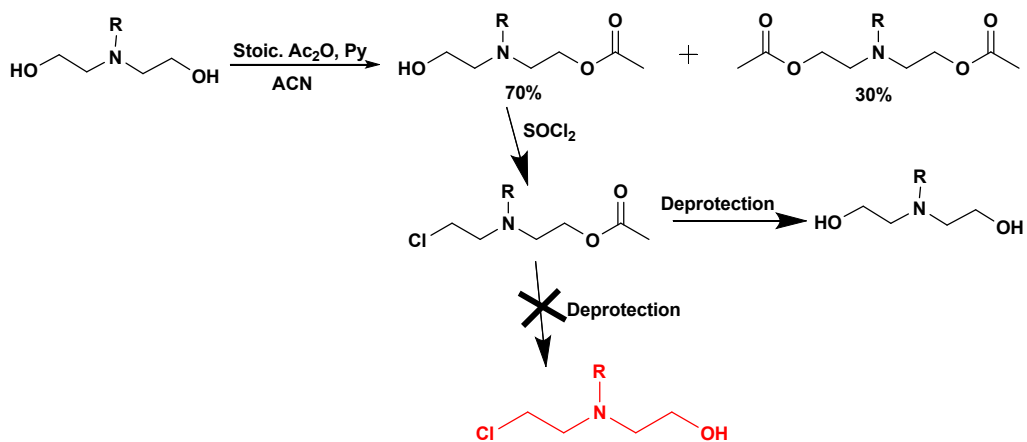

Scheme S1: Different approaches for the synthesis of halfNMs.

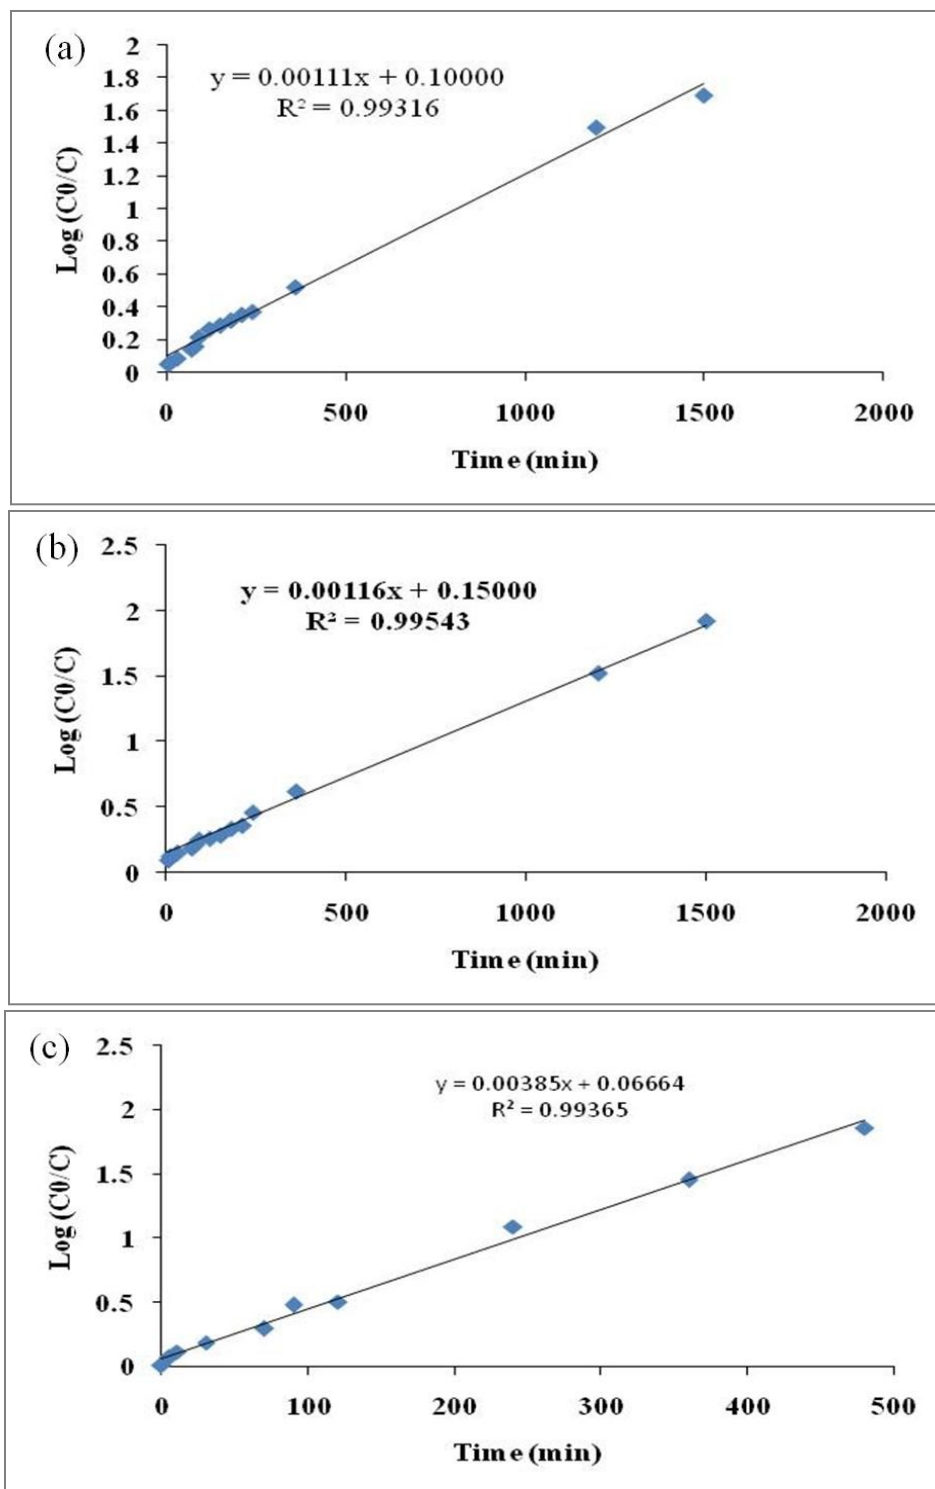

Figure S1: Log ( $C_0/C$ ) vs time (min) co-ordinates for the hydrolysis of (a) HN1 salt (b) HN2 salts and (c) HN3 salts during hydrolysis of each salt in 2:1 (v/v), acetone-water solution. Here  $C_0$  is the concentration of NM at time = 0 min. and  $C$  is the concentration of NM at time =  $t$  min.

Table S1: Observed half-life time of salts of NM in 2:1 (v/v), acetone-water solution.

| SL No. | Salts of NM | Slope (m) | $K = m \times 2.303$ | Half-life time ( $t_{1/2}$ ) = $0.693/K$ |
|--------|-------------|-----------|----------------------|------------------------------------------|
| 1      | HN1         | 0.00111   | 0.00255633           | 271.09 min                               |
| 2      | HN2         | 0.00116   | 0.00267148           | 259.41 min                               |
| 3      | HN3         | 0.00385   | 0.00886655           | 78.16 min                                |

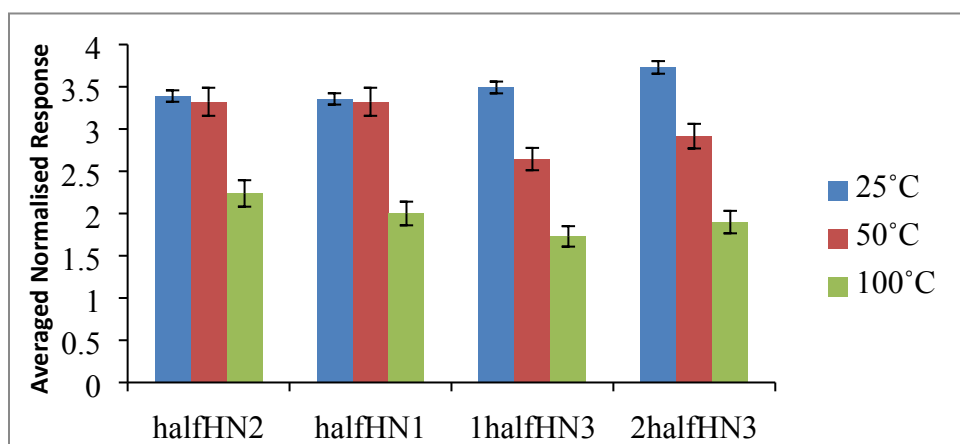

Figure S2: Screening of the temperature for the heptafluorobutyrylation of half NMs.

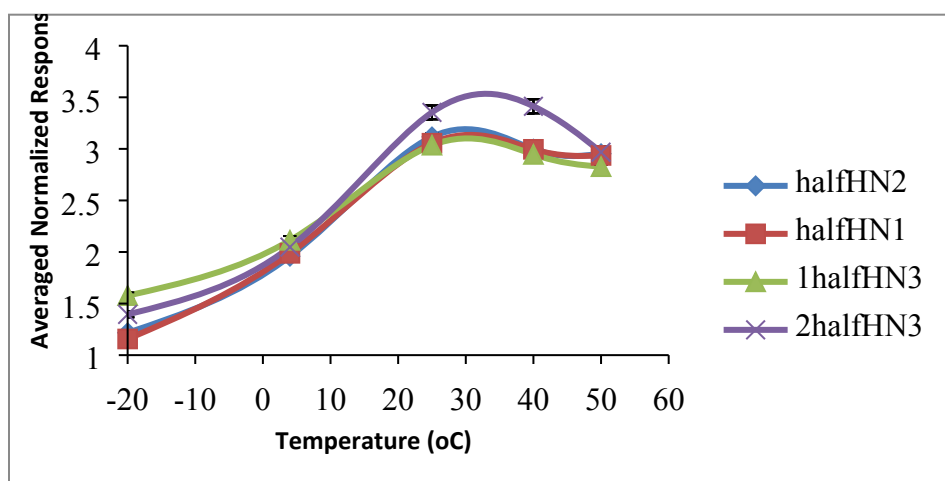

Figure S3: Fine optimization of the temperature for the heptafluorobutyrylation of halfNMs.

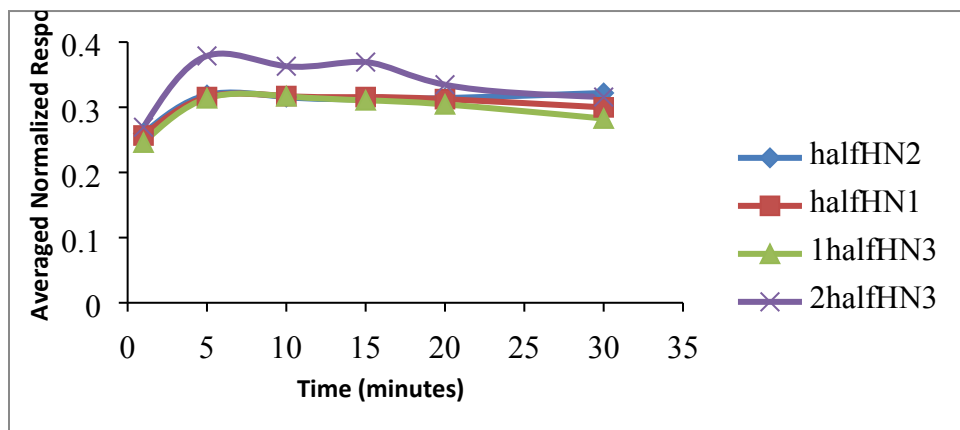

Figure S4: Study of the effect of time on the heptafluorobutyrylation of halfNMs.

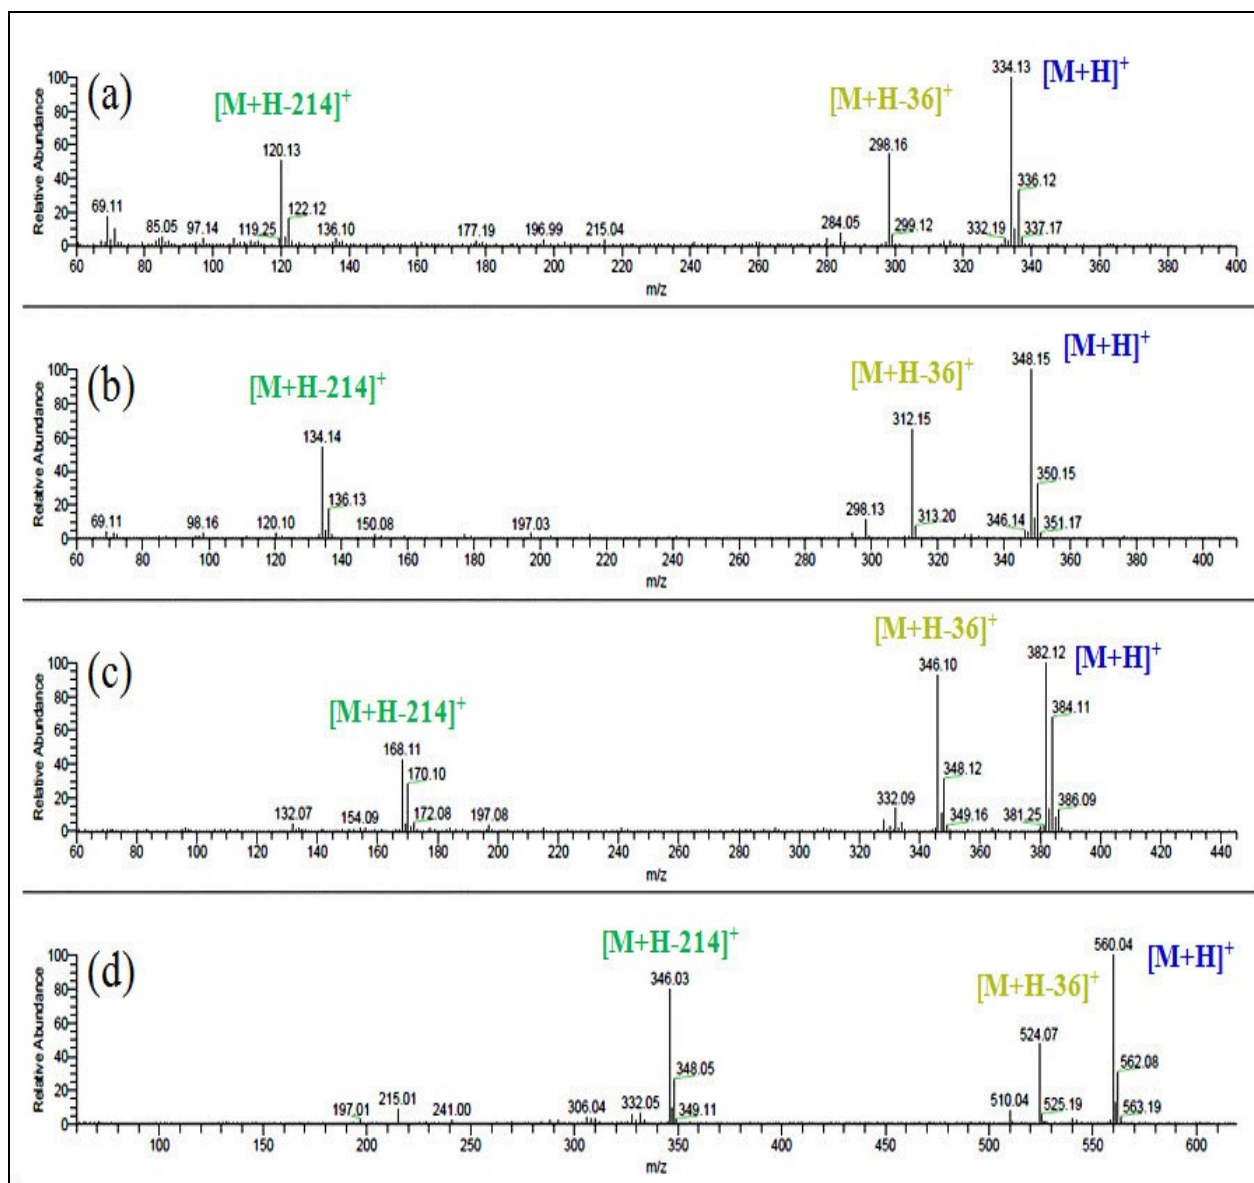

Figure S5: PCI-MS spectra of a) halfHN2HFB, b) halfHN1HFB, c) 1halfHN3HFB and d) 2halfHN3HFB respectively

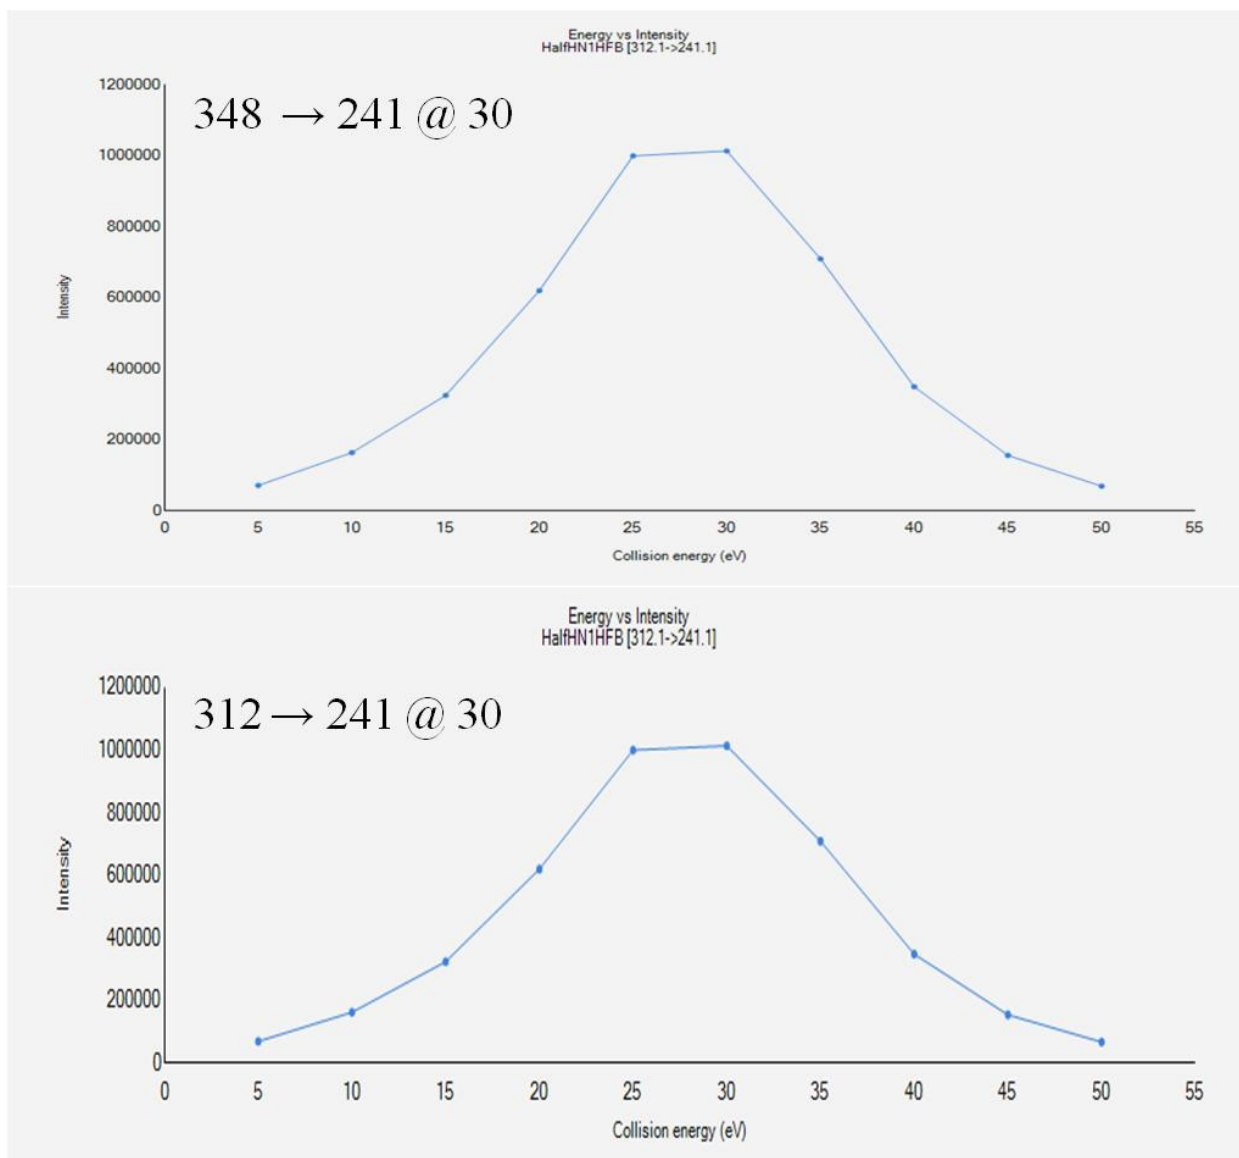

Figure S6a: Optimization of collision energy for the SRM transitions halfHN1HFB.



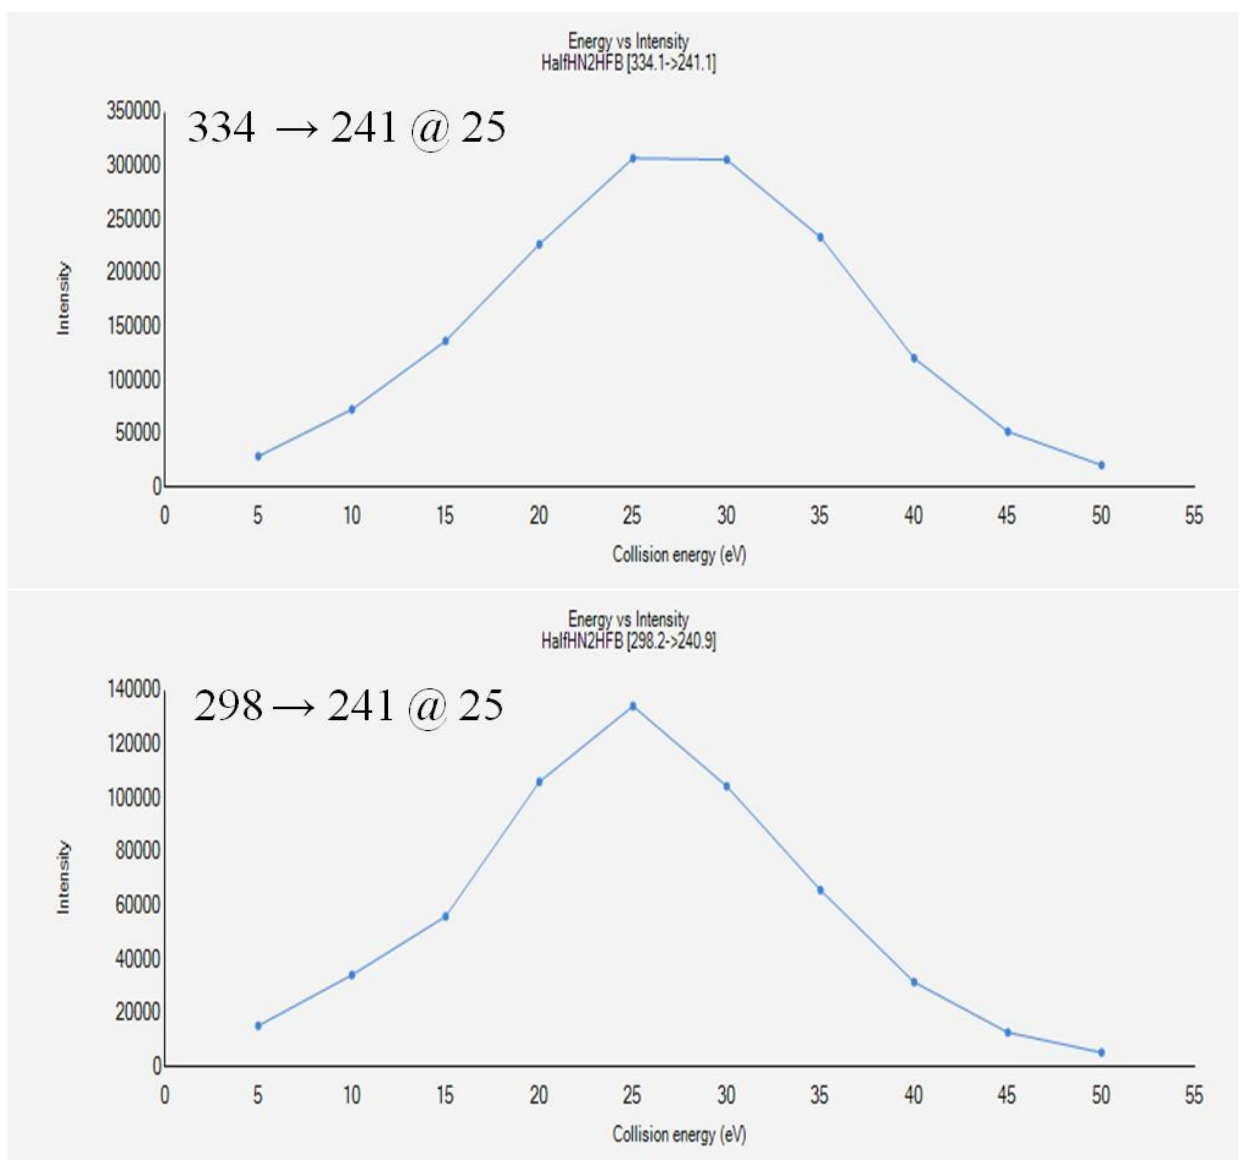

Figure S6b: Optimization of collision energy for the SRM transitions halfHN2HFB.

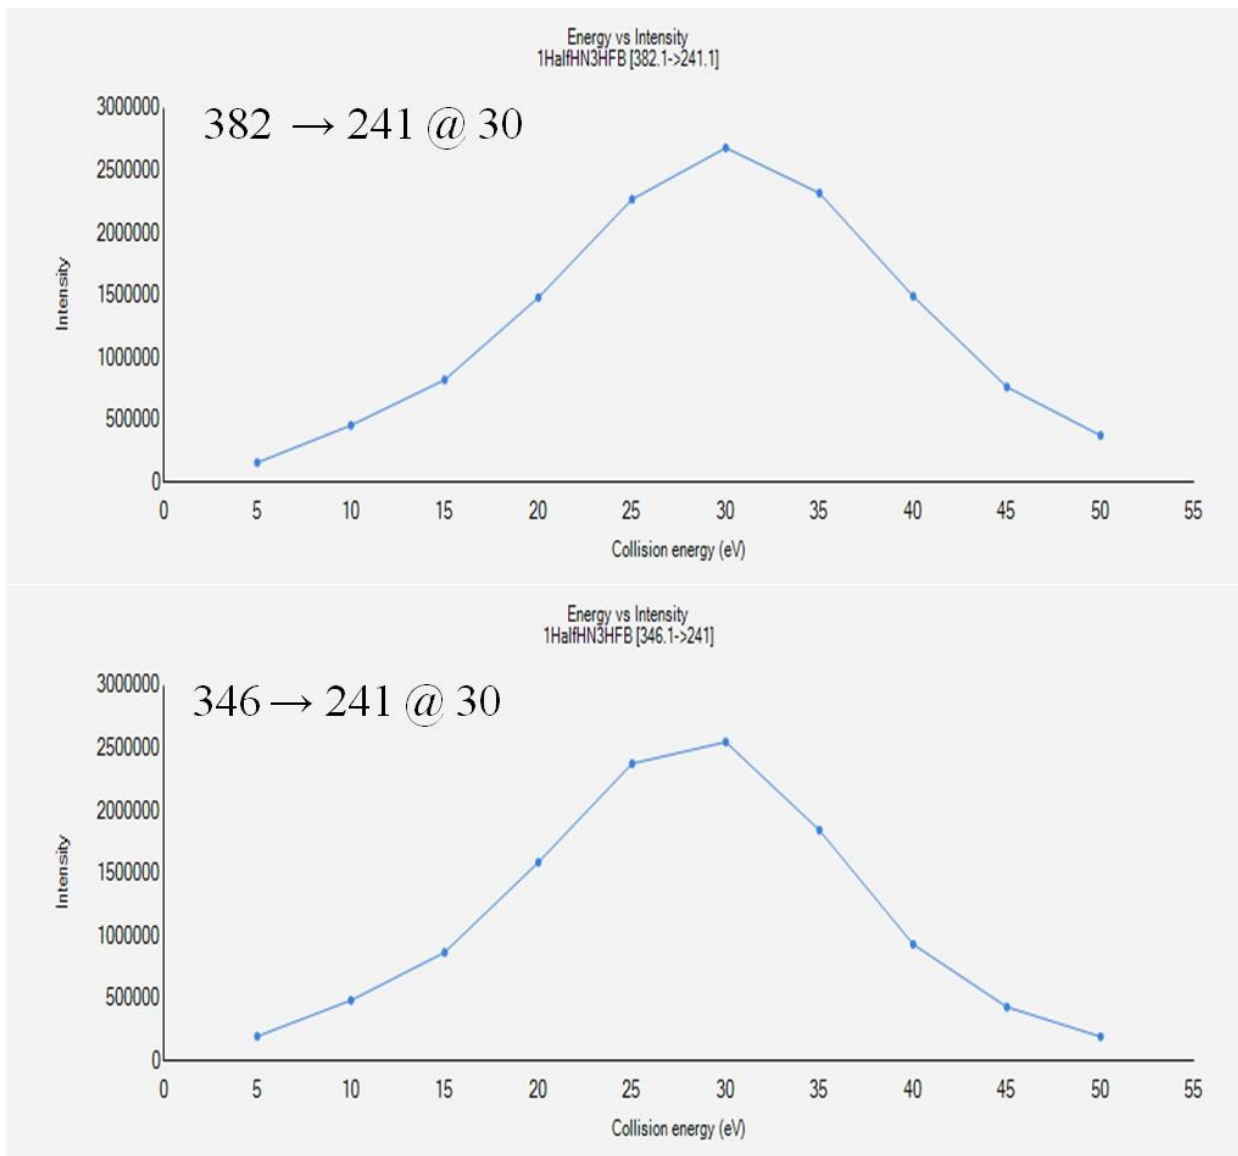

Figure S6c: Optimization of collision energy for the SRM transitions 1halfHN3HFB.

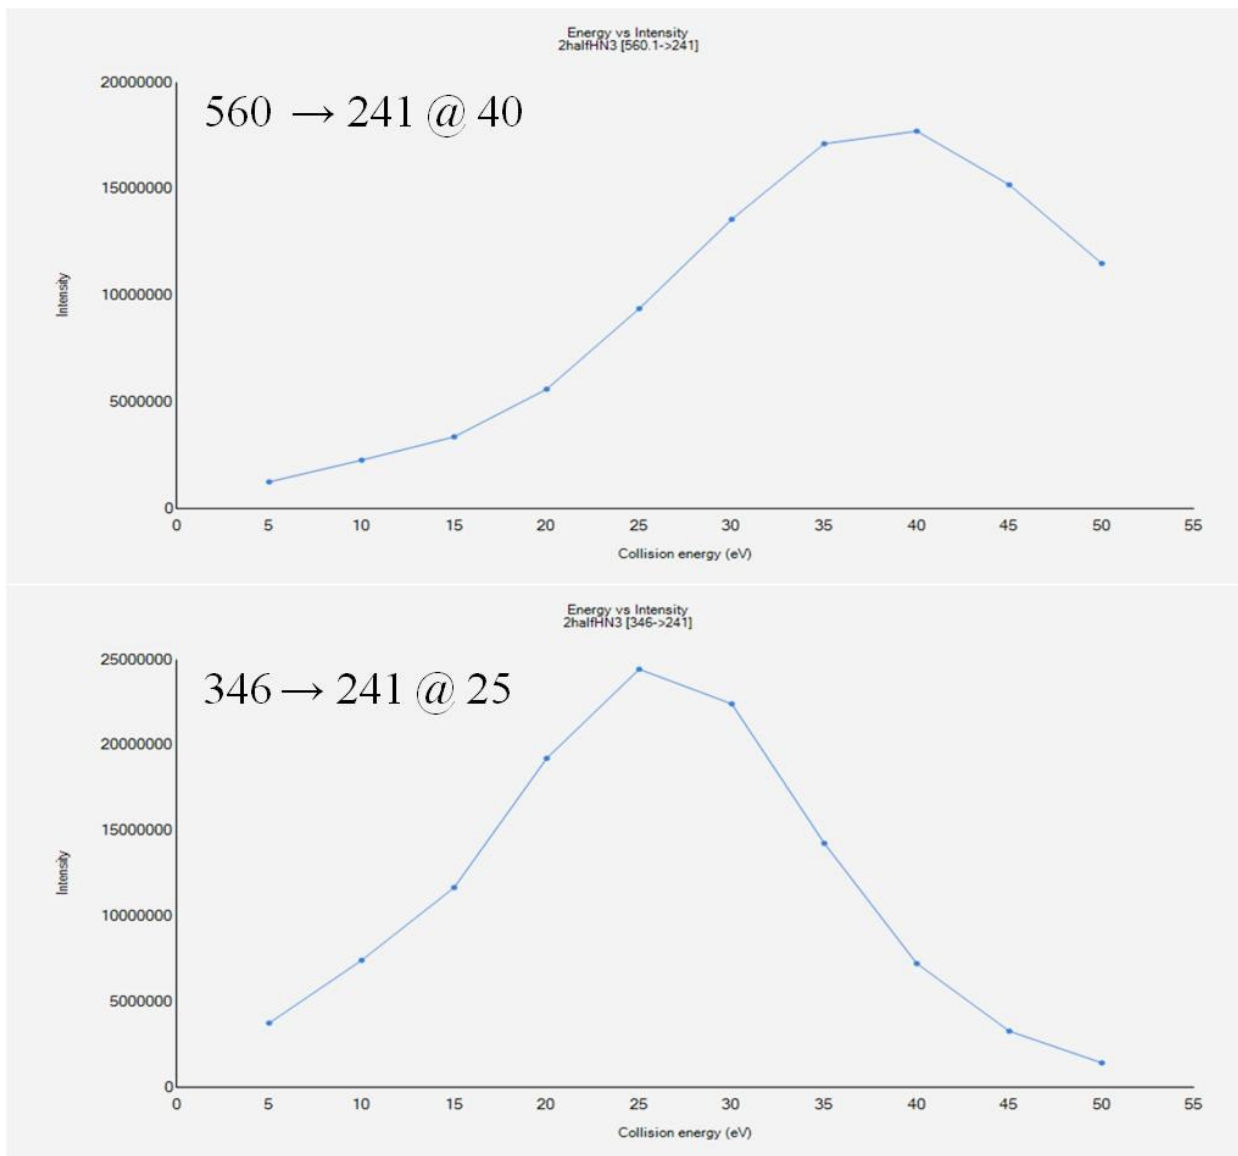

Figure S6d: Optimization of collision energy for the SRM transitions 2halfHN3HFB.

Table S2: Parameters for Multiple Reaction Monitoring (MRM)

| Analytes    | Nature of ions | Ionic transition | Fragmentation energy (eV) |
|-------------|----------------|------------------|---------------------------|
| halfHN1HFB  | Q              | 348 > 241        | 30                        |
|             | q              | 312 > 241        | 30                        |
| halfHN2HFB  | Q              | 334 > 241        | 25                        |
|             | q              | 298 > 241        | 25                        |
| 1halfHN3HFB | Q              | 382 > 241        | 30                        |
|             | q              | 346 > 241        | 30                        |
| 2halfHN3HFB | Q              | 560 > 241        | 40                        |
|             | q              | 346 > 241        | 25                        |
| HCB (IS)    | Q              | 284.9 > 249.8    | 20                        |
|             | q              | 284.9 > 248      | 20                        |

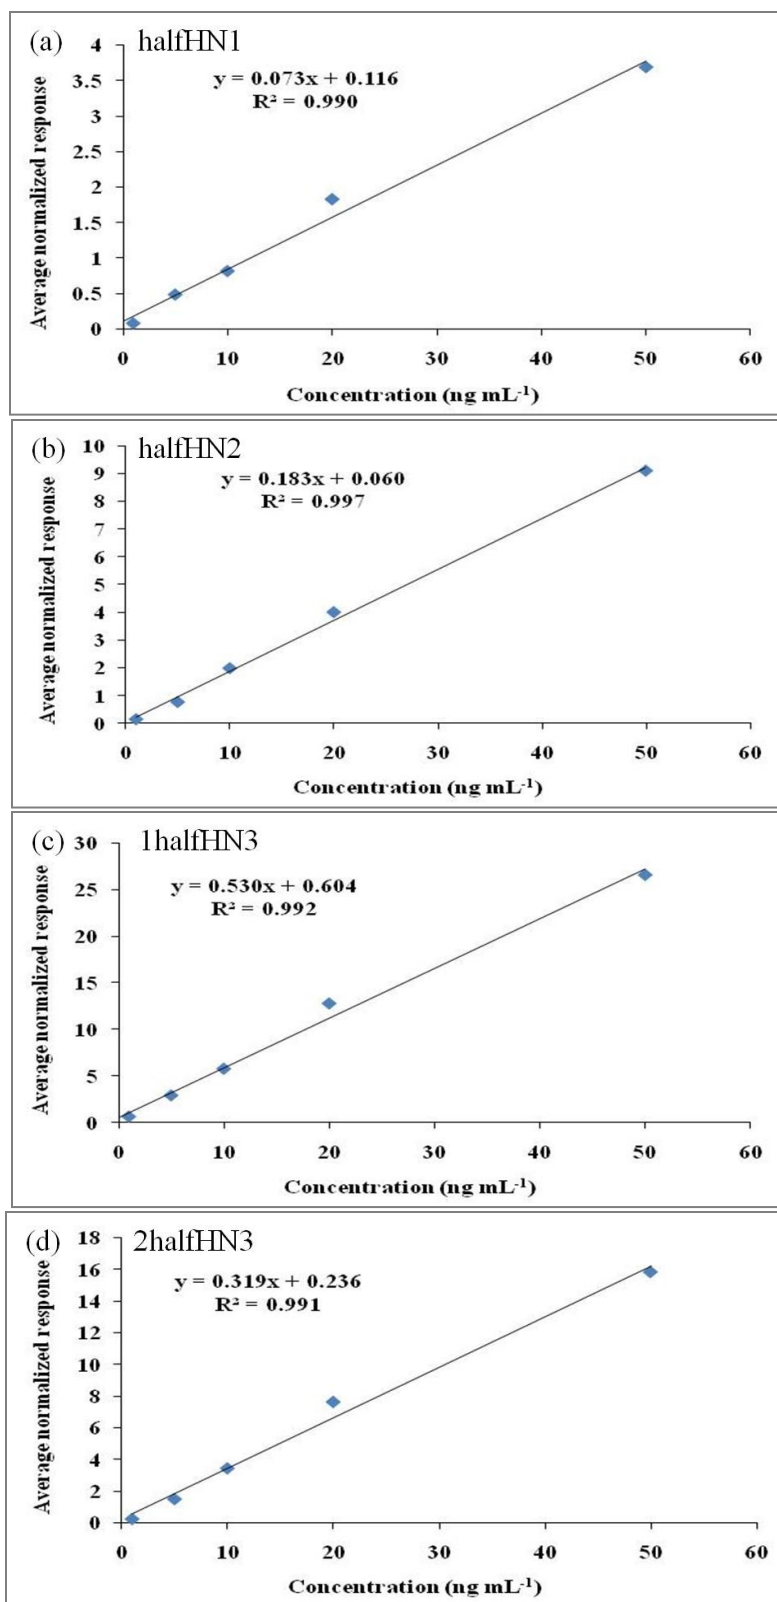

Figure S7: Calibration curve for (a) halfHN1, (b) halfHN2, (c) 1halfHN1 and (d) 2halfHN3 taking plasma as a matrix.

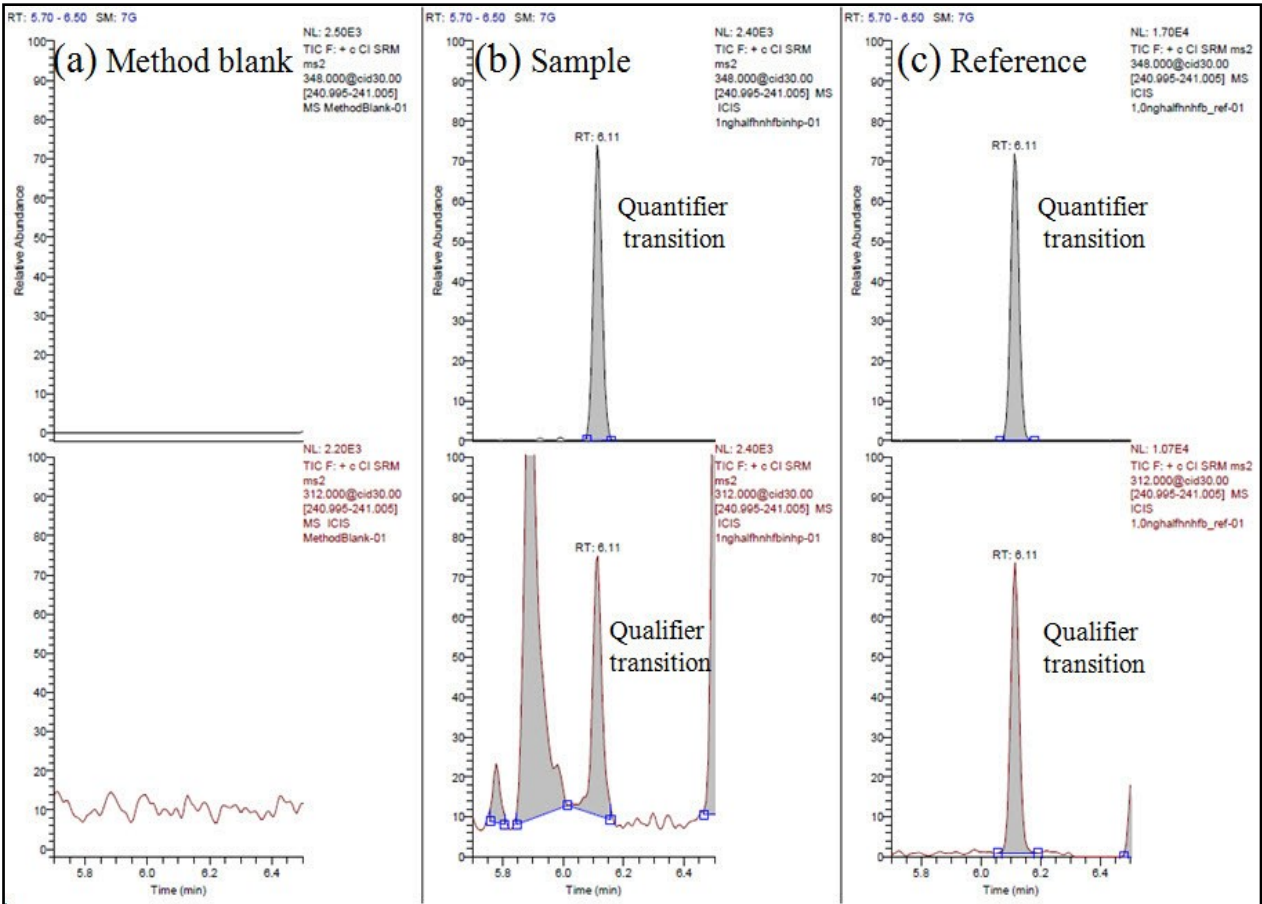

Figure S8: SRM chromatograms, with transition 348 → 241 (quantifier ion) and 312 → 241 (qualifier ion), obtained during *in-vitro* analysis of halfHN1 in human plasma; (a) blank sample, (b) HN1 spiked sample, and (c) Standard reference sample.

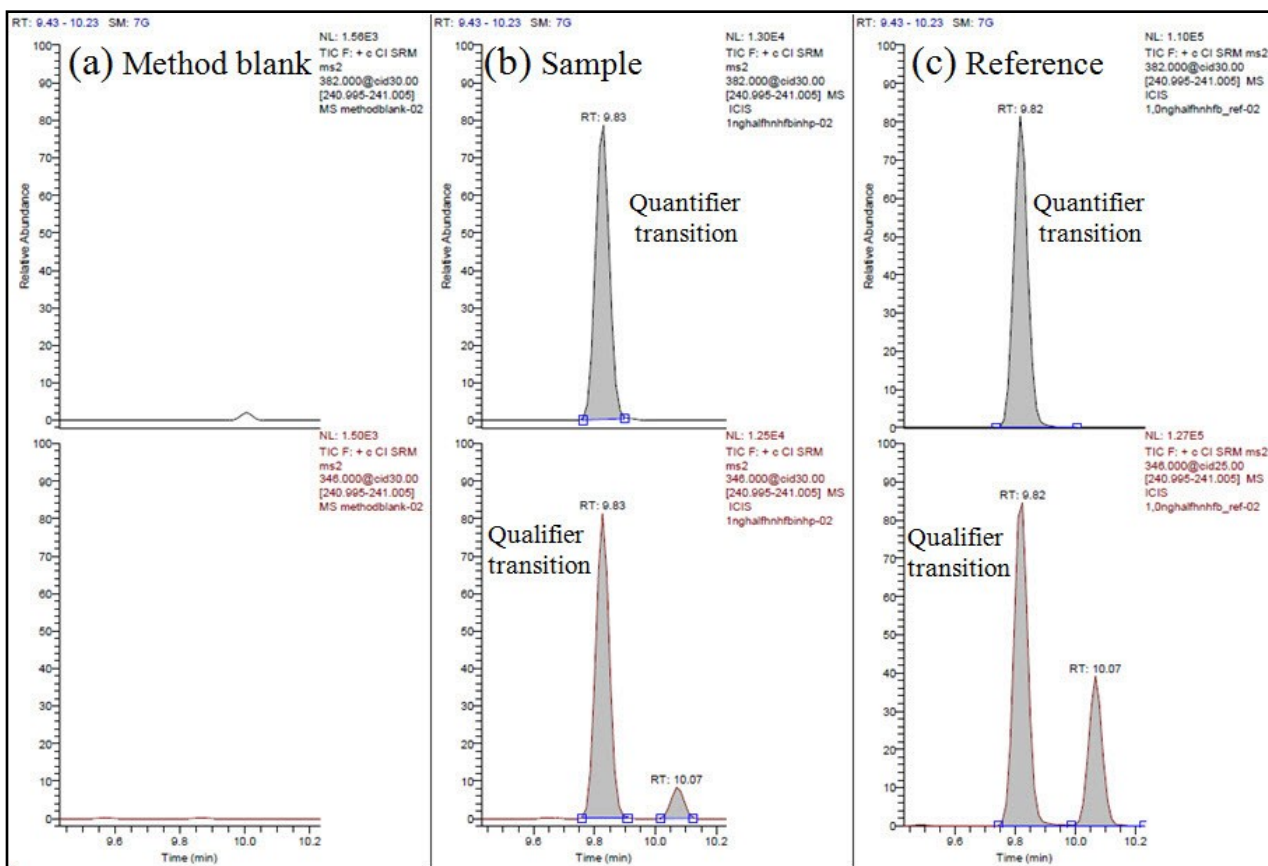

Figure S9: SRM chromatograms, with transition 382 → 241 (quantifier ion) and 346 → 241 (qualifier ion), obtained during the *in-vitro* analysis of 1halfHN3 in human plasma; (a) blank sample, (b) HN1 spiked sample, and (c) Standard reference sample.

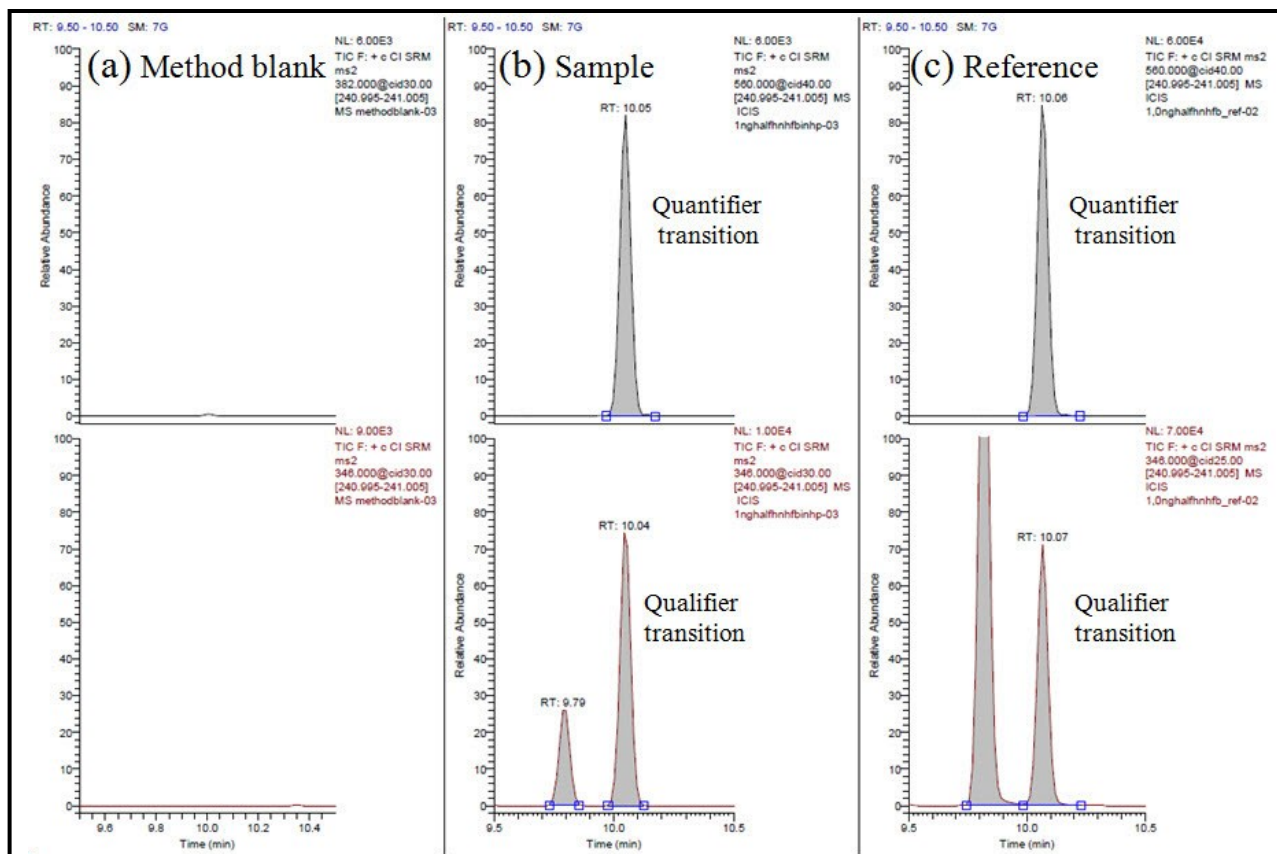

Figure S10: SRM chromatograms, with transition 560 → 241 (quantifier ion) and 346 → 241 (qualifier ion), obtained during the *in-vitro* analysis of 2halfHN3 in human plasma; (a) blank sample, (b) HN1 spiked sample, and (c) Standard reference sample.

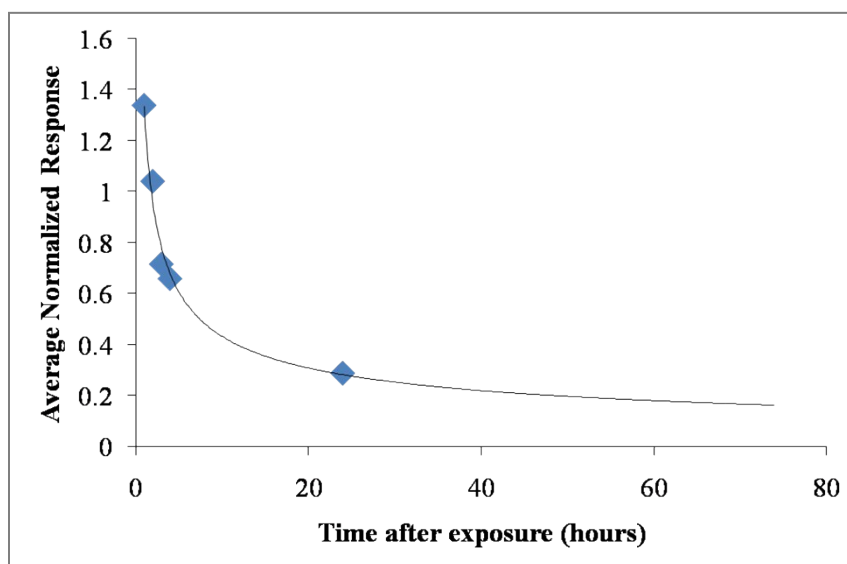

Figure S11: Response of halfHN2 with respect to time after exposure of Wister rat with 1X LD<sub>50</sub> of HN2 (in *vivo* analysis).
